1 **Structure of human DPPA3 bound to the UHRF1 PHD finger reveals its functional and**  
2 **structural differences from mouse DPPA3**

3

4 Nao Shiraishi<sup>1</sup>, Tsuyoshi Konuma<sup>2</sup>, Yoshie Chiba<sup>3</sup>, Sayaka Hokazono<sup>2</sup>, Nao Nakamura<sup>1</sup>, Md  
5 Hadiul Islam<sup>3</sup>, Makoto Nakanishi<sup>3</sup>, Atsuya Nishiyama<sup>3</sup>, Kyohei Arita<sup>1</sup>

6

7 <sup>1</sup>Structural Biology Laboratory and <sup>2</sup>Structural Epigenetics Laboratory, Graduate School of  
8 Medical Life Science, Yokohama City University, 1-7-29, Suehiro-cho, Tsurumi-ku, Yokohama,  
9 Kanagawa 230-0045, Japan.

10 <sup>3</sup>Division of Cancer Cell Biology, The Institute of Medical Science, The University of Tokyo,  
11 4-6-1 Shirokanedai, Minato-ku, Tokyo 108-8639, Japan,

12

13 \*Correspondence: Kyohei Arita, Ph.D.,

14 Structure Biology Laboratory, Graduate School of Medical Life Science, Yokohama City  
15 University, 1-7-29, Suehiro-cho, Tsurumi-ku, Yokohama, Kanagawa 230-0045, Japan, E-mail:  
16 aritak@yokohama-cu.ac.jp; Tel. (+81)45-508-7225; Fax. (+81)45-508-7365.

17

18

19 **Abstract**

20 DNA methylation maintenance is essential for cell fate inheritance. In differentiated cells, this  
21 involves orchestrated actions of DNMT1 and UHRF1. In mice, the high-affinity binding of  
22 DPPA3 to the UHRF1 PHD finger regulates UHRF1 chromatin dissociation and cytosolic  
23 localization, which is required for oocyte maturation and early embryo development. However,  
24 the human DPPA3 ortholog functions during these stages remain unclear. Here, we report the  
25 structural basis for human DPPA3 binding to the UHRF1 PHD finger. The conserved human  
26 DPPA3 <sup>85</sup>VRT<sup>87</sup> motif binds to the acidic surface of UHRF1 PHD finger, whereas mouse  
27 DPPA3 binding additionally utilizes two unique  $\alpha$ -helices. The binding affinity of human  
28 DPPA3 for the UHRF1 PHD finger was weaker than that of mouse DPPA3. Consequently,  
29 human DPPA3, unlike mouse DPPA3, failed to inhibit UHRF1 chromatin binding and DNA  
30 remethylation in *Xenopus egg* extracts effectively. Our data provide novel insights into the  
31 distinct function and structure of human DPPA3.

32

## 33 Introduction

34 DNA methylation, a cytosine methylation at the 5th carbon atom in a CpG sequence, is a major  
35 epigenetic mark that regulates diverse biological processes, including cell-type-specific gene  
36 expression, retrotransposon silencing, X-chromosome inactivation, genome imprinting, and  
37 carcinogenesis<sup>1,2</sup>. Once DNA methylation patterns are established during cell differentiation,  
38 they are faithfully inherited after each replication, to maintain cell identity<sup>3,4</sup>. DNMT1, a  
39 maintenance DNA methyltransferase, and UHRF1 (ubiquitin-like PHD and RING finger  
40 domain-containing protein 1, also known as Np95/ICBP90), a ubiquitin E3-ligase and recruiter  
41 of DNMT1, play pivotal roles in maintaining DNA methylation<sup>5-8</sup>. During this process, the  
42 UHRF1 SET- and RING-associated (SRA) domain specifically binds to hemi-methylated  
43 DNA<sup>9-11</sup>, and UHRF1 ubiquitinates histone H3 or PAF15 (PCNA-associated factor 15) using  
44 a plant homeodomain (PHD) finger for recognition, and ubiquitin-like (UBL) and really  
45 interesting new gene (RING) domains for multiple mono-ubiquitination<sup>12-17</sup>. Ubiquitinated  
46 histone H3 and PAF15 recruit DNMT1 to the late- and early replicating domains,  
47 respectively<sup>17-19</sup>, and stimulate the methyltransferase activity of DNMT1<sup>14,20</sup>.

48 In addition to its well-established role in DNA methylation maintenance, UHRF1 has emerged  
49 as a factor in oocyte and preimplantation embryo development<sup>21-23</sup>. A maternal factor,  
50 developmental pluripotency-associated 3 (DPPA3), also known as Stella/PGC7, has been  
51 identified in mice as a strict inhibitor of chromatin binding of UHRF1 and regulation of its  
52 cytosolic localization, in cooperation with exportin-1<sup>24-26</sup>. Expression of mouse DPPA3  
53 (mDPPA3), an intrinsically disordered protein, is restricted to primordial germ cells, oocytes,  
54 and preimplantation embryos<sup>24,27,28</sup>. mDPPA3 plays an important role in the formation of  
55 oocyte-specific DNA methylation patterns by preventing excessive *de novo* DNA methylation  
56 mediated by UHRF1<sup>24</sup>. Using nuclear magnetic resonance (NMR) solution structural analysis  
57 of mouse the UHRF1 PHD finger (mPHD) bound to mDPPA3, we recently revealed that the  
58 C-terminal region of mDPPA3 binds to mPHD utilizing a VRT motif at residues 88–90

59 (<sup>88</sup>VRT<sup>90</sup>), which is conserved in the motifs of other binding partners, histone H3 <sup>1</sup>ART<sup>3</sup> and  
60 PAF15 <sup>1</sup>VRT<sup>3</sup> with two subsequent  $\alpha$ -helices unique to mDPPA3<sup>29</sup>. Owing to this multifaceted  
61 interaction, the binding affinity of mDPPA3 to mPHD ( $K_D$  of 0.0277  $\mu$ M) is significant stronger  
62 than those of histone H3 and PAF15 ( $K_D$  of 1.59  $\mu$ M and 3.52  $\mu$ M, respectively), indicating  
63 that the mechanism by which mDPPA3 inhibits chromatin-binding of UHRF1 involves the  
64 competitive binding of between mDPPA3 and histone H3/PAF15 to UHRF1<sup>29</sup>.

65 The biological functions of mDPPA3 as a demethylation factor and UHRF1-inhibitor in oocyte  
66 and preimplantation embryos have been extensively studied in mouse models. A recent report  
67 has shown that UHRF1 is enriched in the cytoplasmic lattices of human oocytes<sup>30</sup>. However, it  
68 is unclear if the biological function of mDPPA3 is conserved in human DPPA3 (hDPPA3), and  
69 its role in human oocytes and preimplantation embryos is unknown. Two  $\alpha$ -helices in mDPPA3  
70 which are induced upon binding to mPHD has been shown to be required for the interaction  
71 with mUHRF1<sup>29</sup>. However, the amino acid sequences corresponding to these helices are poorly  
72 conserved between human and mouse DPPA3 (Figure 1a), which raises a question of whether  
73 hDPPA3 also binds to the hUHRF1 PHD finger in a manner similar to their mouse counterparts,  
74 and whether hDPPA3 can inhibit chromatin binding of UHRF1.

75 In this study, we determined the crystal structure of the human UHRF1 PHD finger complexed  
76 with the C-terminal hDPPA3 fragment. The structure clearly showed that the binding mode of  
77 hDPPA3 to the human UHRF1 PHD finger differs markedly from that of the mouse proteins  
78 and explains why hDPPA3 binds to the human UHRF1 PHD finger with low binding affinity,  
79 comparable to the binding of histone H3 and PAF15. Biochemical assays using *Xenopus* egg  
80 extracts demonstrated that the inhibitory effect of hDPPA3 on chromatin-binding of UHRF1 is  
81 relatively modest compared to the strong inhibition by mouse DPPA3. Our findings shed light  
82 on the unexpected role of hDPPA3 in epigenetic regulation during early embryonic  
83 development, which differs from the evidence in mice.

## 84 RESULTS

### 85 Interaction between hDPPA3 and hUHRF1 PHD finger

86 Our previous NMR structural analysis of mDPPA3 complexed with mUHRF1 PHD (mPHD)  
87 revealed that residues 85–118 of mDPPA3 are essential for its interaction with mPHD (Figure  
88 1a and 2b)<sup>29</sup>. Thus, we identified the corresponding region of hDPPA3 by sequence alignment  
89 (residues 81-118 [hDPPA3<sub>81-118</sub>] (Figure 1a and 1b), and evaluated whether this region binds  
90 to the human UHRF1 PHD finger, residues 299–366 (hPHD). Isothermal titration calorimetry  
91 (ITC) demonstrated that hDPPA3<sub>81-118</sub> could bind to hPHD with a  $K_d$  of 0.868  $\mu\text{M}$  (Figure 1c),  
92 which is approximately 30-fold weaker than the binding affinity between mDPPA3 and mPHD  
93 ( $K_d = 0.0277 \mu\text{M}$ )<sup>29</sup>. The binding affinity of hDPPA3 to hPHD<sub>81-118</sub> is comparable with the  
94 previously reported binding affinity between hPHD and the histone H3 N-terminal tail  
95 (residues 1–15;  $K_D = 1.7 \mu\text{M}$ ) or PAF15 (residues 1–10;  $K_D = 2.2 \mu\text{M}$ )<sup>17,31</sup>. To further  
96 investigate the interactions at an atomic resolution, we performed NMR titration experiments.  
97 We successfully assigned <sup>1</sup>H-<sup>15</sup>N heteronuclear single quantum coherence (HSQC) spectra to  
98 [<sup>15</sup>N]-hPHD in the free and complex states with non-labeled hDPPA3<sub>81-118</sub> (Supplementary  
99 Figure 1a). The <sup>1</sup>H-<sup>15</sup>N HSQC spectra of [<sup>15</sup>N]-hPHD titrated with non-labeled hDPPA3<sub>81-118</sub>  
100 showed that the HSQC signals shifted in the intermediate exchange regime on a chemical shift  
101 timescale, supporting the modestly weak interaction between hDPPA3<sub>81-118</sub> and hPHD (Figure  
102 1d). These data indicate that the binding of hDPPA3 to hPHD was not significantly stronger  
103 than that of the other binding partners, histone H3 and PAF15. Chemical shift differences  
104 (CSD) between the free and complexed states showed relatively large values for Asp330,  
105 Met332, Asp337, Glu355, and Asp356, suggesting the contribution of the main chain of these  
106 amino acid residues to the hPHD–hDPPA3 interaction (Supplementary Figure 1b).

107

108

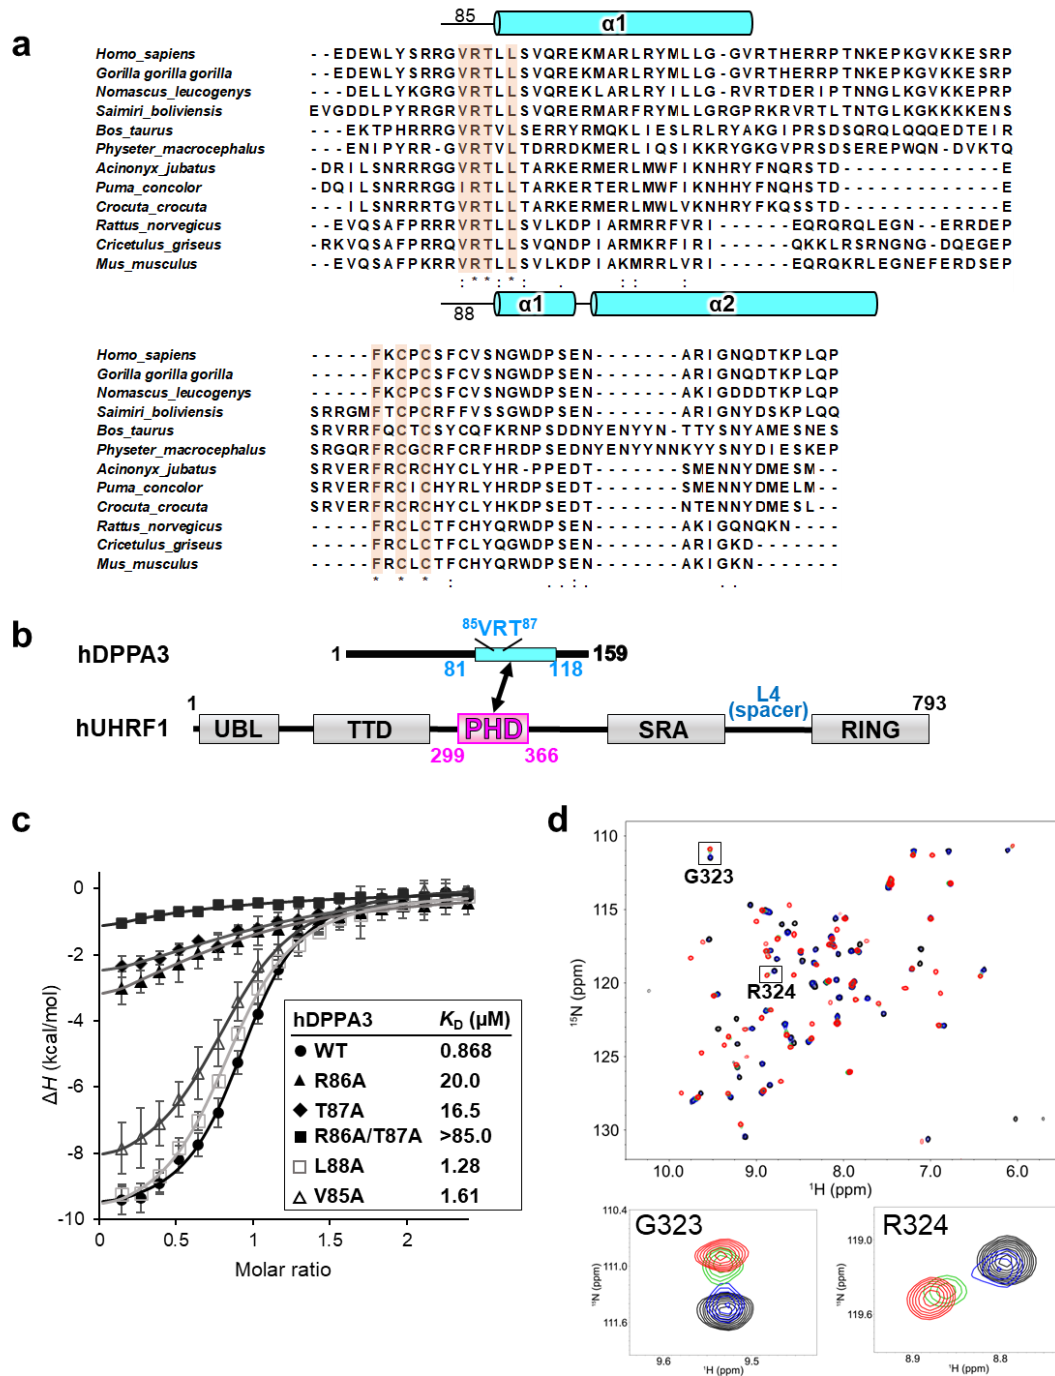

109 **Figure 1: Characterization of the interaction between mUHRF1 and mDPPA3.**

110 (a) Schematic of the domain composition of human UHRF1 and DPPA3. (b) Amino acid  
111 sequence alignment of C-terminal part of DPPA3. Secondary structures of mouse and human  
112 DPPA3 are indicated based on PDB:7XGA and analysis of this study, respectively. (c)  
113 Isothermal titration calorimetry measurements for hPHD and wild-type (WT)/mutants of  
114 hDPPA3<sub>81-118</sub>. Superimposition of enthalpy change plots with standard deviations. Data were  
115 presented as mean values for n = 3. (d) Overlay of <sup>1</sup>H-<sup>15</sup>N heteronuclear single quantum  
116 coherence (HSQC) spectra of 30  $\mu M$  mPHD showing chemical shift changes upon titration  
117 with hDPPA3<sub>81-118</sub> of 0  $\mu M$  (black), 15  $\mu M$  (blue), 30  $\mu M$  (green), and 60  $\mu M$  (red). Square  
118 regions inside the HSQC spectra were expanded (lower panels).

## 119 **Crystal structure of hDPPA3 bound to hPHD**

120 To reveal the molecular basis for the binding mode of hDPPA3 to hPHD, we determined the  
121 crystal structure of hDPPA3<sub>81-118</sub> in complex with hPHD at a 2.4 Å resolution (Table 1). The  
122 asymmetric unit contained one hPHD:hDPPA3<sub>81-118</sub> complex, and a  $2|F_o|-|F_c|$  map  
123 corresponding to residues 299–363 of hPHD and residues 84–107 of hDPPA3<sub>81-118</sub> was  
124 unambiguously observed (Supplementary Figure 2a). hPHD consists of pre- and core-PHD  
125 domains that include three zinc finger motifs (Figure 2a)<sup>31</sup>. The structure of the hPHD moiety  
126 in the complex with hDPPA3<sub>81-118</sub> was well-superimposed on apo-hPHD (PDB:3SOX, root  
127 mean square deviation [RMSD] of C $\alpha$  atoms with 0.848 Å) and those in the complex with  
128 histone H3 (PDB:3ASL, RMSD: 0.795 Å) and PAF15 (PDB:6IIW, RMSD: 0.397 Å), implying  
129 that the binding of hDPPA3 does not undergo conformational changes in hPHD  
130 (Supplementary Figure 2b).

131 In contrast to the hPHD moiety, the binding mode of hDPPA3 shares both similarities and  
132 dissimilarities with that of mDPPA3 (Figure 2a, 2b). The conserved VRT motif at residues 85–  
133 87 of hDPPA3<sub>81-118</sub> is accommodated on the acidic surface of hPHD, the binding site for <sup>1</sup>ART<sup>3</sup>  
134 of histone H3, and <sup>1</sup>VRT<sup>3</sup> of PAF15, in a manner concordant with the motif in mDPPA3  
135 (<sup>88</sup>VRT<sup>90</sup>) (Figure 2b). The side chain of Val85–hDPPA3<sub>81-118</sub> forms a hydrophobic interaction  
136 with Leu331, Val352, Pro353, and Trp358 in hPHD (Figure 2a). The positively charged  
137 guanidino group at Arg86 of hDPPA3<sub>81-118</sub> forms hydrogen bonds with the side chains of  
138 Asp334 and Asp337 of hPHD (Figure 2a and 2c). The side chain methyl and hydroxyl groups  
139 of Thr87 in hDPPA3<sub>81-118</sub> forms hydrophobic interactions with Leu331 and Val352 of hPHD  
140 and hydrogen bonds with the main chain amide of Ser90 of hDPPA3 (Figure 2a). The latter  
141 potentially functions as a helical cap for the N-terminus of the following  $\alpha$ -helix (Figure 2a).  
142 Leu88 of hDPPA3<sub>81-118</sub> is surrounded by the side chains of Ala317, Gln330, Met332, and  
143 Ala339 in hPHD, in which the side chain of Met332 functions as a separation between the side  
144 chains of Arg86 and Leu88 of hDPPA3<sub>81-118</sub> (Figure 2a).

145 When mPHD binds to mDPPA3, the two  $\alpha$ -helices following the VRT motif of mDPPA3 form  
146 an L-like shape, in which the long  $\alpha$ -helix binds to the shallow groove between the pre- and  
147 core-PHD fingers (Figure 2b). However, the C-terminus of the <sup>85</sup>VRT<sup>87</sup> motif of hDPPA3<sub>81-118</sub>  
148 forms a unique conformation that differed from that of mDPPA3. Residues 88–101 of hDPPA3  
149 forms a four-turn single  $\alpha$ -helix, which is not kinked and markedly differs from mDPPA3  
150 complexed with mPHD (Figure 2a and 2b). The contact area between the hPHD and hDPPA3  
151 (ca. 449 Å<sup>2</sup>) was smaller than that of the mouse protein (ca. 1360 Å<sup>2</sup>)<sup>32</sup>, which is concordant  
152 with the weaker dissociation constant of the human proteins.

153

154



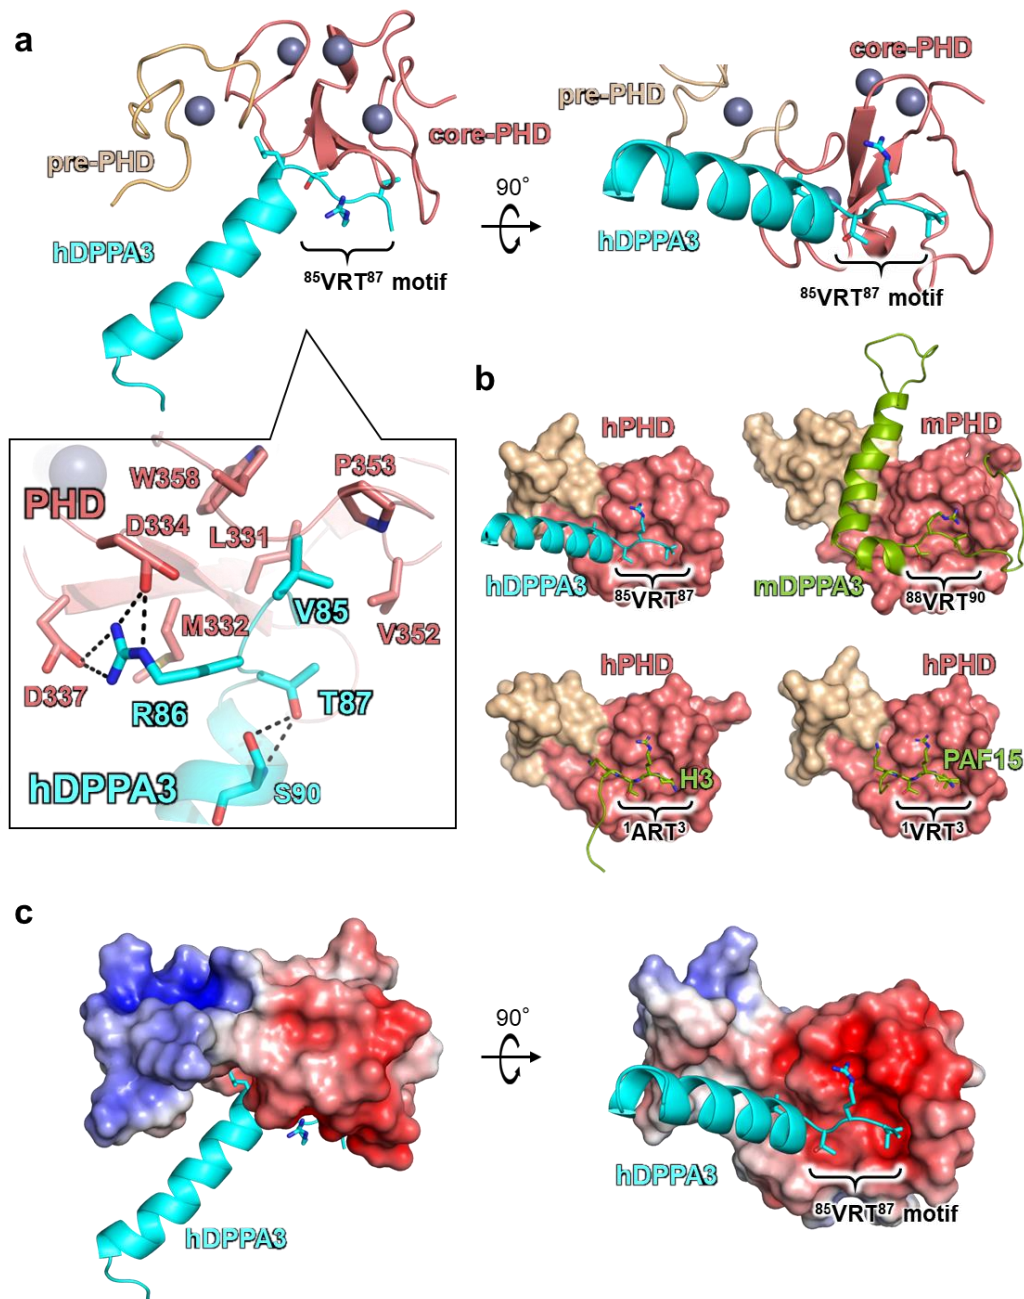

155 **Figure 2: Crystal structure of hDPPA3<sub>81-118</sub> in complex with hPHD**

156 **(a)** Overall structure of hPHD:hDPPA3<sub>81-118</sub> complex. Pre-PHD, core-PHD and hDPPA3 are  
 157 depicted as gold, salmon, and cyan cartoon models, respectively. The conserved VRT motif in  
 158 hDPPA3 is displayed as a stick model. Inset shows the interaction between the VRT motif of  
 159 hDPPA3 and hPHD. The black dotted line represents a hydrogen bond. **(b)** Structural  
 160 comparison of hPHD:hDPPA3 (this study, upper left), mPHD:mDPPA3 (PDB: 7XGA, upper  
 161 right), hPHD:H3 (PDB: 3ASL, bottom left) and hPHD:PAF15 (PDB: 6IIW, bottom right)  
 162 complexes. mDPPA3, H3 and PAF15 are shown as a green cartoon model and VRT (ART)  
 163 motif are represented as stick model. **(c)** Electrostatic surface potential of hPHD calculated  
 164 with program APBS<sup>33</sup>. The red and blue surface colors represent negative and positive  
 165 charges, respectively. hDPPA3 is depicted as a cyan cartoon.

166 **Structural feature of hPHD:hDPPA3 in solution**

167 Intriguingly, the  $\alpha$ -helix of hDPPA3<sub>81-118</sub> has no contact with the hPHD moiety in the crystal  
168 (Figure 2a and 2c). Instead, the  $\alpha$ -helix interacts with the corresponding part of a symmetry  
169 molecule related to a crystallographic two-fold axis (Supplementary Figure 2c). This  
170 interaction in the crystal gives rise to two possibilities: the helical structure formation of  
171 hDPPA3 is an artifact of crystal packing, or the hPHD:hDPPA3 complex forms a dimer  
172 structure via the interaction mediating the  $\alpha$ -helix of hDPPA3.

173 Next, we examined the structure of hDPPA3<sub>81-118</sub> in solution using circular dichroism (CD) and  
174 size-exclusion chromatography in line with small angle X-ray scattering (SEC-SAXS) which  
175 can analyze the solution structure, oligomeric state, conformational changes and flexibility of  
176 biomacromolecules at a scale ranging from a few Å to hundreds of nm (Supplementary Figure  
177 3a–c, Supplementary Table 1)<sup>34</sup>. The CD spectrum exhibited that hDPPA3<sub>81-118</sub> alone showed  
178 a typical random-coil spectrum (Figure 3a). The CD spectrum of hDPPA3<sub>81-118</sub> mixed with  
179 hPHD showed a negative peak at 222 nm, which was lower than the sum of the spectra of  
180 hPHD and hDPPA3<sub>81-118</sub> alone (Figure 3a), indicating that the binding of hDPPA3 to hPHD  
181 involved a coupled folding and binding mechanism. The SEC-SAXS data also supported the  
182 coupled folding and binding mode of hDPPA3. The dimensionless Kratky plot showed the  
183 unfolding state of sole hDPPA3<sub>81-118</sub>, whereas the hPHD:hDPPA3<sub>81-118</sub> complex was in a  
184 globular state (Figure 3b).

185 SEC-SAXS experiments also revealed that the molecular mass of the measured proteins was  
186 estimated by the empirical volume of correlation  $V_c$ <sup>35</sup>, resulting in a 13.0 kDa  
187 hPHD:hDPPA3<sub>81-118</sub> complex, which was highly similar to the molecular weight calculated  
188 from the amino acid sequence of the hPHD:hDPPA3<sub>81-118</sub> complex with 1:1 stoichiometry (12.2  
189 kDa) (Supplementary Table 1). The *ab initio* model of the measured proteins showed clear  
190 results. The overall shape of the bead model was well superimposed on the crystal structure of  
191 the hPHD:hDPPA3<sub>81-118</sub> complex in the asymmetric unit (Figure 3c, 3d). These data indicated

192 that hDPPA3 binds to hPHD at 1:1 stoichiometry with the induction of a four-turn single  $\alpha$ -  
 193 helix.

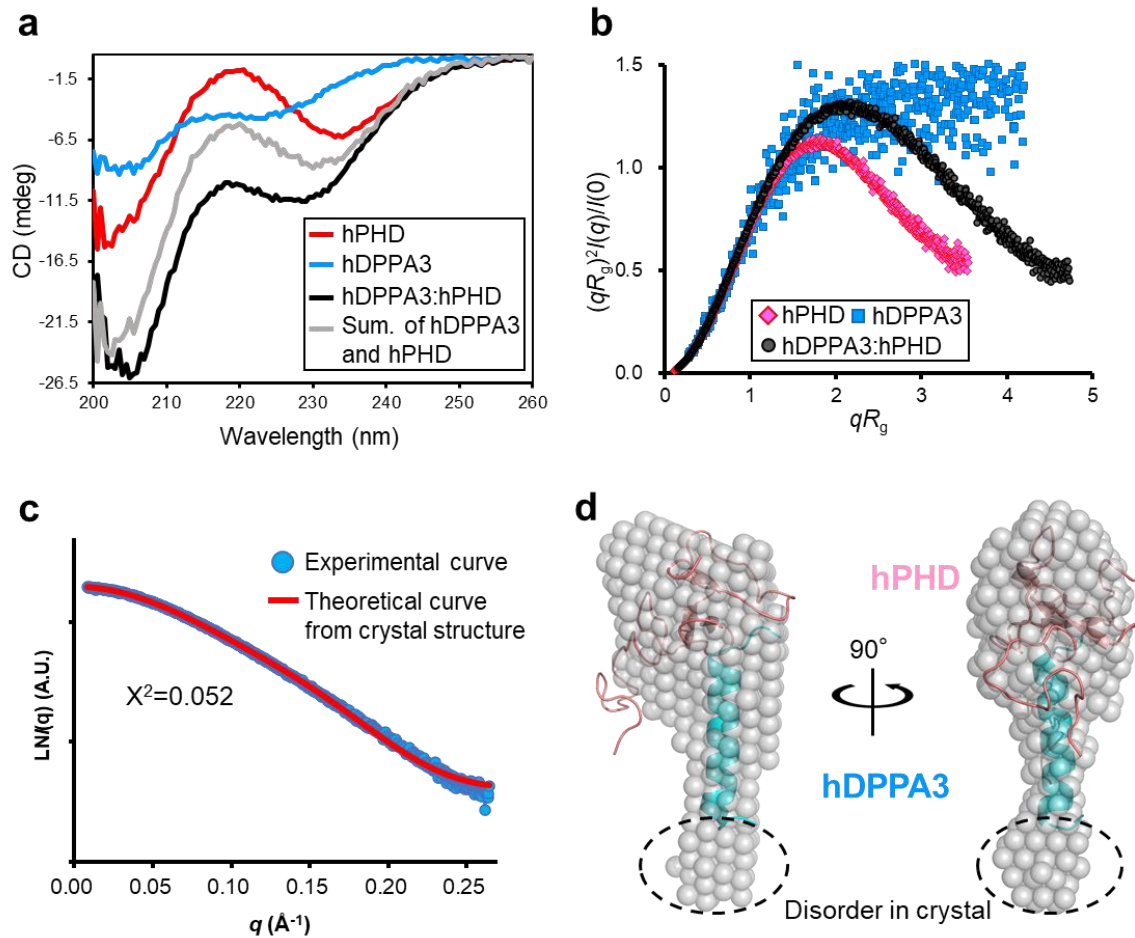

194 **Figure 3: Solution structure of hDPPA3**

195 (a) CD spectra of hPHD alone (red), hDPPA3<sub>81-118</sub> alone (blue), and the hPHD in complex with  
 196 hDPPA3<sub>81-118</sub> (black). The sum of CD spectra of hPHD alone and hDPPA3<sub>81-118</sub> alone is shown  
 197 as gray. (b) Dimensionless Kratky plots of hPHD alone (red diamond), hDPPA3<sub>81-118</sub> alone  
 198 (blue square), and hPHD in complex with hDPPA3<sub>81-118</sub> (black circle) derived from small-angle  
 199 X-ray scattering (SAXS) data. (c) Structural comparison of solution and crystal structures of  
 200 the hPHD:hDPPA3<sub>81-118</sub> complex. Left shows the comparison of scattering curves derived from  
 201 experimental data and the crystal structure of the hPHD:hDPPA3<sub>81-118</sub> complex. Right shows  
 202 the *ab initio* bead model of the hPHD:hDPPA3<sub>81-118</sub> complex derived from the SAXS scattering  
 203 data. A low-resolution bead model (transparent gray sphere) is superimposed on the crystal  
 204 structure (cartoon).

205

206

## 207 **Validation of the structural data by mutational analysis**

208 To validate our structural data and confirm the contribution of individual residues to complex  
209 formation, ITC experiments were conducted using hPHD and hDPPA3 harboring mutations in  
210 the VRT sequence. Mutations with deleterious effects on the interaction were R86A and T87A  
211 of hDPPA3, which reduced the dissociation constant to 20.0 and 16.5  $\mu\text{M}$ , respectively, and a  
212 double mutation (R86A/T87A), which resulted in a more severe reduction in the interaction,  
213 with a  $K_D$  exceeding 85.0  $\mu\text{M}$  (Figure 1c). In contrast, alanine mutations at Val85 and Leu88  
214 in hDPPA3 had less marked effects on the hPHD:hDPPA3 interaction (Figure 1c).

215 We further investigated mutants of DPPA3 that affect dimer formation as observed in the crystal  
216 structure (Supplementary Figure 4a). R98A/M102A, located at C-terminal region in the  $\alpha$ -helix  
217 of hDPPA3 and potentially interacting with hPHD of the symmetrical molecule in the crystal,  
218 did not reduced the binding affinity. Similarly, M96A/L99A, which contribute to the formation  
219 of the helix bundle of hDPPA3 in the crystal, also had no effect on the interaction with hPHD,  
220 validating the 1:1 stoichiometry of the hPHD:hDPPA3 complex in solution. Interestingly, the  
221 introduction of proline residue, known as a helix breaker, at both Arg93 and A97 in hDPPA3  
222 (R93P/A97P) significantly reduced the binding affinity to hPHD, with  $K_D$  of 9.39  $\mu\text{M}$   
223 (Supplementary Figure 4a), indicating that helical structural formation following the VRT  
224 motif in hDPPA3 is crucial for its interaction with hPHD.

225 Next, mutations were introduced into hPHD. Concordant with the hDPPA3 mutants, the  
226 D334A/D337A mutations in hPHD, which form an ionic-pair with Arg86 of hDPPA3, had a  
227 severe effect, reducing the binding affinity to a  $K_D$  exceeding 115  $\mu\text{M}$ . The M332A hPHD  
228 mutation showed a decreased binding affinity, with a  $K_D$  of 8.07  $\mu\text{M}$  (Supplementary Figure  
229 4a). ITC data based on mutant proteins indicate that the VRT motif of hDPPA3 is important for  
230 its interaction with the UHRF1 hPHD finger.

231

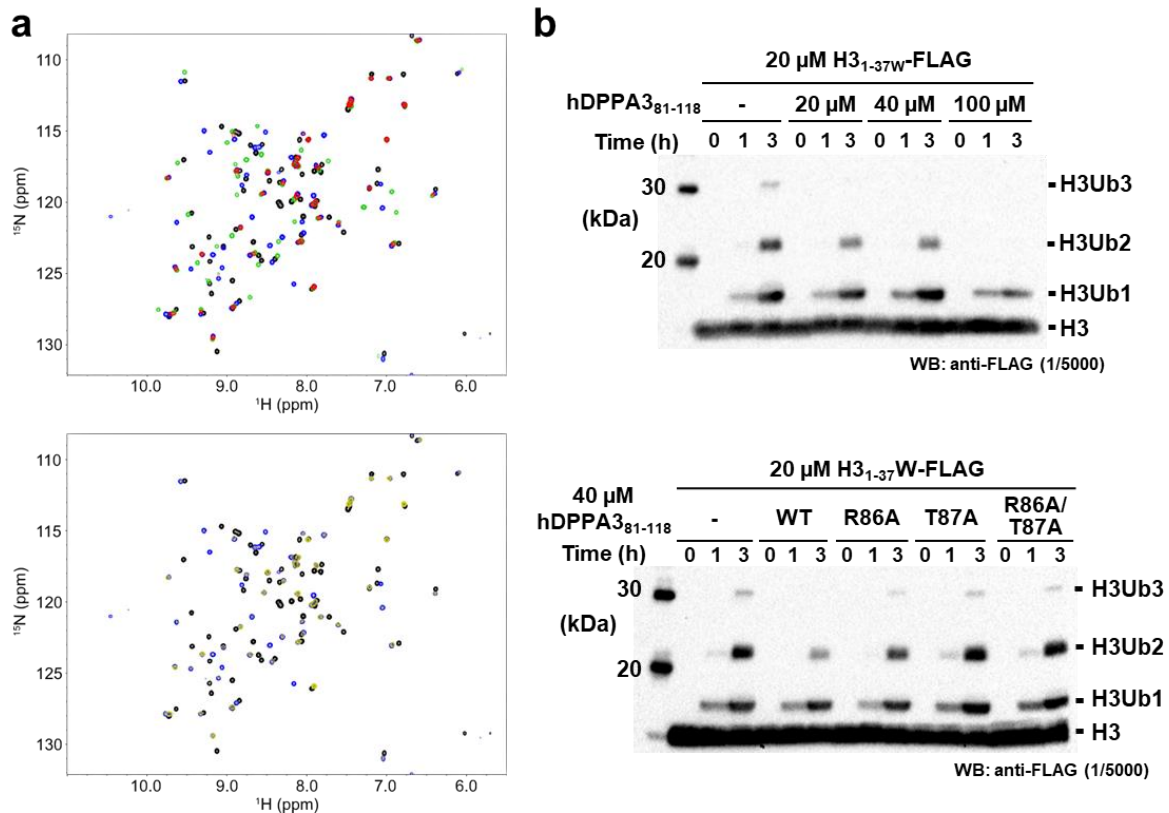

232

233 **Figure 4: Competitive assay between hDPPA3 and the histone H3 tail.**

234 **(a)** Overlay of <sup>1</sup>H-<sup>15</sup>N HSQC spectra of <sup>15</sup>N-labeled hPHD in the presence of hDPPA3<sub>81-</sub>  
 235 <sub>118</sub> and/or the H3<sub>1-37W</sub> peptide at a molar ratio of 1:0:0 (black), 1:2:0 (green), 1:0:2 (blue), and  
 236 1:2:2 (red) of hPHD:hDPPA3:H3 (upper), and of 1:0:0 (black), 1:0:2 (blue), and 1:2:8 (yellow)  
 237 of hPHD:hDPPA3:H3 (lower). **(b)** *In vitro* ubiquitination assay. C-terminal FLAG tagged-H3<sub>1-</sub>  
 238 <sub>37W</sub> was ubiquitinated using in-house purified E1, E2, and human UHRF1 (E3). The  
 239 ubiquitinated H3 was detected using anti-FLAG antibody. Upper panel shows that 20, 40, and  
 240 100  $\mu$ M hDPPA3<sub>81-118</sub> was added to the reaction solution including 20  $\mu$ M of H3<sub>1-37W</sub>. The  
 241 lower panel presents results of an *in vitro* ubiquitination assay using 40  $\mu$ M hDPPA3<sub>81-118</sub>  
 242 mutants. The gel image is representative of n = 3 independent experiments.

243

## 244 **Effect of hDPPA3 on UHRF1 function**

245 Next, to analyze whether hDPPA3 affects the biological functions of UHRF1, ubiquitination  
246 of histone H3, and chromatin binding, we performed NMR titration assays and *in vitro*  
247 biochemical experiments using recombinant proteins and *Xenopus* egg extracts. First, we  
248 examined the competitive binding of hDPPA3 and histone H3 to hPHD because both hDPPA3  
249 and histone H3 mainly bind to the acidic surface of hPHD via the <sup>85</sup>VRT<sup>87</sup> and <sup>1</sup>ART<sup>3</sup> motifs,  
250 respectively. We conducted NMR titration experiments using <sup>1</sup>H-<sup>15</sup>N labeled hPHD and non-  
251 labeled hDPPA3<sub>81-118</sub> and/or histone H3 peptides (residues 1–37W; the H3<sub>1-37W</sub> peptide). The  
252 HSQC spectrum of hPHD mixed with hDPPA3<sub>81-118</sub> and the H3<sub>1-37W</sub> peptide  
253 (hPHD:hDPPA3:H3 = 1:2:2) showed most of the signals, with weakened or no intensity by the  
254 broadening due to chemical exchange, suggesting that, as expected, hDPPA3<sub>81-118</sub> and the H3<sub>1-</sub>  
255 <sub>37W</sub> peptide competitively bound to the acidic surface of hPHD as the shared binding site  
256 (Figure 4a, upper). In the presence of excess H3<sub>1-37W</sub> peptide (hPHD:hDPPA3<sub>81-118</sub>:H3 = 1:2:8),  
257 hDPPA3<sub>81-118</sub> could not bind to hPHD (Figure 4a, lower). This differed from the situation with  
258 mDPPA3, which bound to mPHD even in the presence of excess H3<sub>1-37W</sub> peptide  
259 (mPHD:mDPPA3:H3 = 1:2:8)<sup>29</sup>. An *in vitro* ubiquitination assay of C-terminal FLAG-tagged  
260 H3<sub>1-37W</sub> with full-length human UHRF1 also supported the weak inhibitory effect of hDPPA3.  
261 hDPPA3 did not effectively inhibit ubiquitination of the histone H3 tail, whereas mDPPA3  
262 showed a markedly negative effect on ubiquitination (Supplementary Figure 4b). The addition  
263 of hDPPA3 to a 1–2 equimolar excess of histone H3 only slightly inhibited histone H3  
264 ubiquitination (Figure 4b). Mutant forms of hDPPA3, which exhibited decreased binding to  
265 hPHD, failed to inhibit ubiquitination of histone H3 (Figure 4b). These findings indicate that  
266 the binding of hDPPA3<sub>81-118</sub> to UHRF1 inhibits the ubiquitination activity of UHRF1 on histone  
267 H3; however, the inhibitory effect was moderately weak due to the low binding affinity  
268 between hDPPA3<sub>81-118</sub> and UHRF1.  
269 Finally, we tested the ability of hDPPA3 to inhibit UHRF1 chromatin binding in *Xenopus* egg

270 extracts (Figure 5a). As previously reported, the addition of 0.5  $\mu$ M recombinant mDPPA3 to  
271 interphase extracts was sufficient to block UHRF1 chromatin loading, UHRF1-dependent  
272 PAF15 ubiquitylation, and DNMT1 recruitment (Figure 5b). In contrast, hDPPA3 did not  
273 inhibit the chromatin binding of UHRF1 and DNMT1 recruitment, even at 1.0  $\mu$ M (Figure 5b).  
274 Consistently, hDPPA3 did not show significant inhibitory activity on DNA methylation in  
275 *Xenopus* egg extracts compared to mDPPA3 (Figure 5c).

276 Taken together, the binding of hDPPA3 to hUHRF1 PHD competes with that of histone H3.  
277 However, it is noteworthy that the inhibitory effect exerted by hDPPA3 was relatively modest,  
278 implying that hDPPA3 does not appear to function as a strong inhibitor of UHRF1 chromatin  
279 binding, unlike mouse DPPA3.

280

281

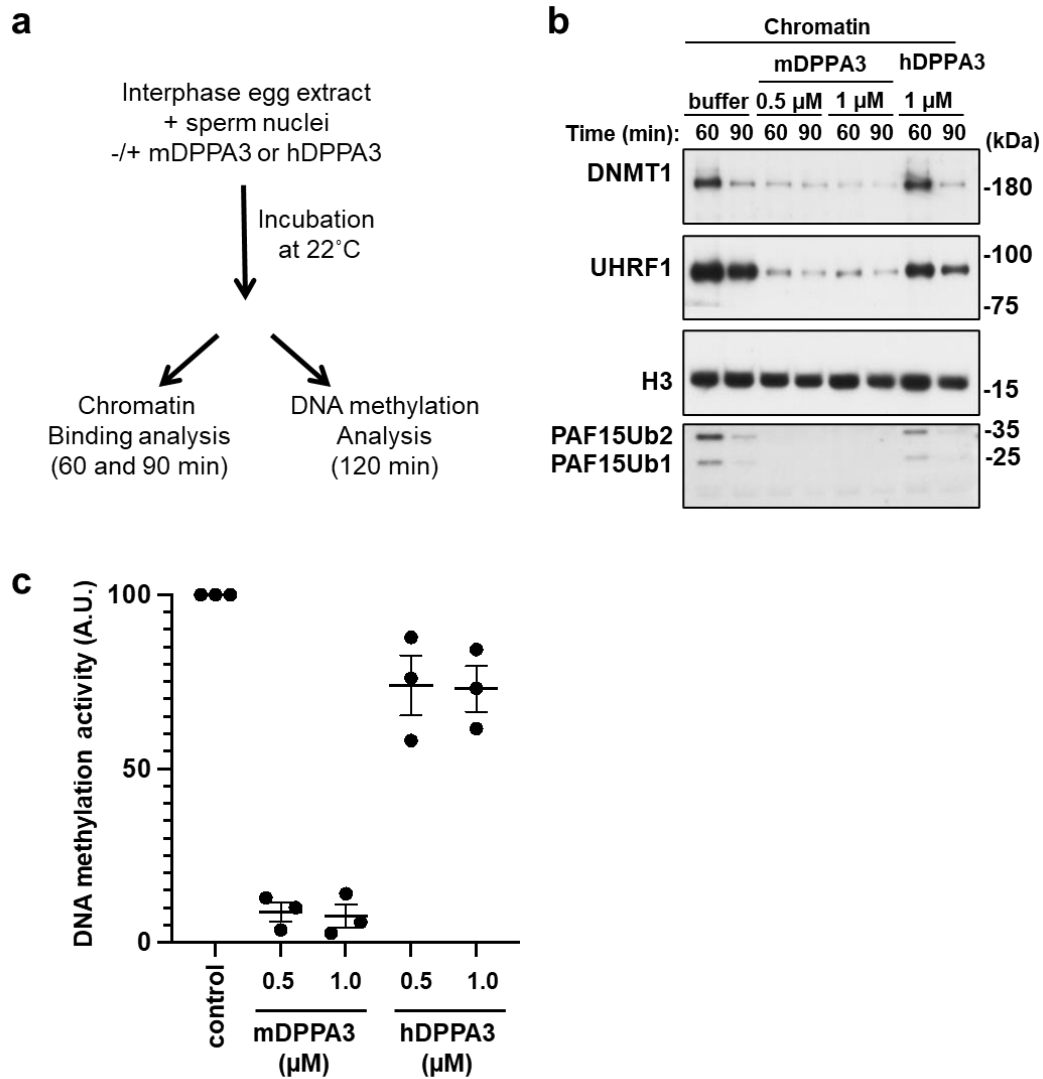

282

283 **Figure 5: Functional assay of DPPA3 using *Xenopus* egg extracts.**

284 **(a)** Experimental design for functional analysis of DPPA3 using *Xenopus* egg extracts. **(b)**

285 Sperm chromatin was incubated with interphase *Xenopus* egg extracts supplemented with  
286 buffer (+buffer), FLAG-mDPPA3, or FLAG-hDPPA3. Chromatin fractions were isolated and  
287 immunoblotted using the indicated antibodies. The gel image is representative of n=3

288 independent experiments. **(c)** Sperm chromatin was added to interphase egg extracts  
289 supplemented with radiolabeled S-[methyl-<sup>3</sup>H]-adenosyl-L-methionine and buffer (control),  
290 FLAG-mDPPA3, or FLAG-hDPPA3. The efficiency of DNA methylation maintenance was

291 assessed by the incorporation of radio-labeled methyl groups from S-[methyl-<sup>3</sup>H]-adenosyl-L-  
292 methionine (<sup>3</sup>H-SAM) into DNA purified from the egg extracts. Data were presented as mean  
293 values ± SD for n = 3

294



295 **DISCUSSION**

296 Our structural analysis revealed that human DPPA3 binds to hPHD solely through a conserved  
297 VRT sequence motif. This finding is consistent with biochemical data showing that the binding  
298 affinity of hDPPA3 to hPHD was in the sub-micro order range of  $K_D$ , with an approximately  
299 30-fold decrease in the binding affinity of its mouse protein counterpart. The weak binding  
300 affinity of hDPPA3 was insufficient to inhibit the chromatin binding of UHRF1 in *Xenopus* egg  
301 extracts. Our data suggested that the inhibitory effect of hDPPA3 differs from that of mDPPA3  
302 under similar conditions. This raises the question of whether hDPPA3 can act as an inhibitor  
303 of UHRF1 in human oocytes and early embryogenesis. There are several possibilities to  
304 consider in this regard. Intrinsically disordered protein (region) containing low complexity  
305 sequence frequently associates with formation of liquid-liquid phase separation (LLPS)<sup>36</sup>.  
306 Notably, sequence analysis of human and mouse DPPA3 using FuzDrop  
307 (<https://fuzdrop.bio.unipd.it>) indicated that human DPPA3 exhibits a higher potential for  
308 droplet formation than mouse DPPA3 (Supplementary Figure 5)<sup>37</sup>. This prediction suggests that  
309 condensed hDPPA3 within the droplet may preferentially bind to UHRF1, thereby inhibiting  
310 the chromatin binding of UHRF1. In another situation, the level of hDPPA3 protein expression  
311 in human oocytes and zygotes is key to the inhibition of UHRF1 chromatin binding. Our data  
312 indicated that the binding affinity of hDPPA3 for hPHD was approximately 1.7-fold stronger  
313 than that of histone H3, suggesting that a locally high concentration of hDPPA3 contributes to  
314 its preferential binding to hUHRF1 to inhibit chromatin binding. Another possibility involves  
315 post-translational modifications of histone H3. Given that the methylation of Arg2 and  
316 phosphorylation of Thr3 in histone H3 greatly impair its binding to the UHRF1 PHD finger<sup>31</sup>,  
317 hDPPA3 might bind to UHRF1 even at low protein concentrations. Recently, NLRP14  
318 (Nucleotide-binding oligomerization domain, leucine-rich Repeat and Pyrin domain  
319 containing) has emerged as a factor related to reproduction. It interacts with UHRF1 in the  
320 zygote and two-cell stages in the cytosol<sup>21,38</sup>. If cytoplasmic localization of UHRF1 is not

321 mediated by hDPPA3, it may be important for UHRF1 to interact with NLRP14 immediately  
322 after its translation into the cytoplasm. Interestingly, the cytosolic localization of the mRNA of  
323 a guanine nucleotide exchange factor, NET1, has been reported to regulate protein–protein  
324 interactions after translation, ultimately determining protein localization<sup>39</sup>.

325 The VRT motif in DPPA3, which binds to the acidic surface of the UHRF1 PHD finger, is well  
326 conserved across various species (Figure 1b). Conversely, the amino acid sequence  
327 corresponding to the  $\alpha$ -helix following the VRT motif showed significant diversity.  
328 Interestingly, AlphaFold2 (AF2) structural prediction indicated that mDPPA3 has both short  
329 and long  $\alpha$ -helices following the VRT motif, forming an L-like shape, consistent with our NMR  
330 structure of the mPHD:mDPPA3 complex (Supplementary Figure 6)<sup>40</sup>. In contrast, human  
331 DPPA3 exhibits a single long  $\alpha$ -helix at the same position. AF2 predictions also suggest that  
332 *Homo sapiens* (UniProt ID: Q6W0C5), *Bos taurus* (A9Q1J7), *Gorilla gorilla gorilla*  
333 (G3RB81), *Saimiri boliviensis* (A0A2K6SNG1), *Puma concolor* (A0A6P6HCW6), *Nomascus*  
334 *leucogenys* (A0A2I3H008), *Crocuta crocuta* (A0A6G1B388), *Physeter macrocephalus*  
335 (A0A2Y9EH83), and *Acinonyx jubatus* (A0A6I9ZFC3) possess a single  $\alpha$ -helix, while *Mus*  
336 *musculus* (Q8QZY3), *Rattus norvegicus* (Q6IMK0), and *Cricetulus griseus* (A0A3L7H856)  
337 have two  $\alpha$ -helices, consisting of both short and long  $\alpha$ -helices, as far as we could find in the  
338 database (Supplementary Figure 6). These observations suggest the potential limitation of the  
339 two  $\alpha$ -helices to Rodentia and underscore the utility of AF2 structural prediction for the  
340 classification of the DPPA3 function based on the helical content. The major difference in the  
341 helical region of human and mouse DPPA3 is the substitution of a proline residue with a lysine  
342 residue at the 95th position of human DPPA3 (Figure 1a). A similar substitution is also found  
343 in the species that predictably forms as single  $\alpha$ -helix. However, the K95P mutation in human  
344 DPPA3 did not enhance its binding affinity for hPHD (Supplementary Figure 7a). AF2  
345 prediction of the K95P mutant of hDPPA3 suggested that a single  $\alpha$ -helix remains the  
346 predominant conformation (Supplementary Figure 8), suggesting that the differences in the

347 helical structural regions of human and mouse DPPA3 are governed by more complex  
348 mechanisms than a simple amino acid substitution.

349 The distinctive  $\alpha$ -helical arrangement in hDPPA3 revealed in our structural analysis shed light  
350 on the function of this protein in oocytes and preimplantation embryo development distinct  
351 from the mouse DPPA3. Our results encourage further investigations into the functional  
352 implications of hDPPA3, potentially paving the way for novel discoveries in this context.

353

## 354 **Methods**

### 355 **Peptides and Primers**

356 The human DPPA3 peptide, residues 81-118 (NH<sup>2</sup>-<sup>81</sup>  
357 SRRGVRTLLSVQREKMARLRYMLLGGVIRTHERRPTNKE<sup>118</sup>-COOH) for  
358 crystallography and K95P substituted hDPPA3<sub>81-118</sub> for ITC experiment were purchased from  
359 Toray Research Center (Tokyo, Japan). Primers for site-directed mutagenesis of hDPPA3 are  
360 listed as follows:

361 V85A (Forward: 5'-GAGAGGAGCAAGAACATTGCTGTCTGTGCA-3', Reverse: 5'-  
362 ATGTTCTTGCTCCTCTCCTGCTCCACCTC-3'),

363 R86A (Forward: 5'- AGGAGTAGCAACATTGCTGTCTGTGCAGAG-3', Reverse: 5'-  
364 GCAATGTTGCTACTCCTCTCCTGCTCCAC-3'),

365 T87A (Forward: 5'- AGTAAGAGCATTGCTGTCTGTGCAGAGAGA-3', Reverse: 5'-  
366 ACAGCAATGCTCTTACTCCTCTCCTGCTCC-3'),

367 L88A (Forward: 5'- AAGAACAGCGCTGTCTGTGCAGAGAGAAAA-3', Reverse: 5'-  
368 CAGACAGCGCTGTTCTTACTCCTCTCCTGC-3')

369 R86A/T87A (Forward: 5'- AGGAGTAGCAGCATTGCTGTCTGTGCAGAG-3', Reverse: 5'-  
370 ACAGCAATGCTGCTACTCCTCTCCTGCTCC-3').

371 R98A/M102A (Forward: 5'- GGCAGCATTGAGATACGCGTTACTCGGCGGAGTTC -3',  
372 Reverse: 5'- GTAACGCGTATCTCAATGCTGCCATCTTTTCTCTC -3').

373 M96A/L99A (Forward: 5'- AAAGGCGGCAAGAGCGAGATACATGTTACTCGGCG -3',  
374 Reverse: 5'- ATCTCGCTCTTGCCGCCTTTTCTCTCTGCACAGAC -3').

375 R93P/A97P (Forward: 5'- GCAGCCAGAAAAGATGCCAAGATTGAGATACATGT -3',  
376 Reverse: 5'- ATCTTGGCATCTTTTCTGGCTGCACAGACAGCAAT -3').

377

### 378 **Protein expression and purification**

379 Human UHRF1 PHD finger (residues 299-366) for crystallography, SAXS, NMR, CD, and

380 ITC experiments was expressed in *Escherichia coli* (*E.coli*) and purified according to previous  
381 paper<sup>31</sup>. Briefly, hPHD was expressed as a GST-fusion protein and purified using glutathione  
382 Sepharose 4B (GS4B), anion exchange (HiTrap Q) and 26/600 Supedex 75 chromatography  
383 (Cytiva). hDPPA3, residues 81–118, for SAXS, NMR, CD, ITC and ubiquitination experiments  
384 was expressed as a six histidine-tagged ubiquitin (His-Ub) fusion protein. The protein was  
385 expressed in *E. coli* BL21 (DE3) in Luria–Bertani medium (LB) containing 12.5 µg/ml  
386 kanamycin. When the optical density at 660 nm (O.D.660) of the cells reached 0.7, 0.4 mM  
387 isopropyl β-d-thiogalactoside (IPTG) was added to the medium and the cells were further  
388 harvested for 6 h at 30 °C. The cells were suspended in lysis buffer (40 mM Tris-HCl [pH7.5],  
389 400 mM NaCl and 30 mM imidazole). After cell lysis by sonication and removal of cell debris  
390 by centrifugation, the supernatant was loaded onto a histidine-tag affinity column Ni Sepharose  
391 6 Fast Flow (Cytiva), and the sample was eluted from the column using elution buffer  
392 containing 500 mM imidazole. Next, the His-Ub tag was removed by *Saccharomyces*  
393 *cerevisiae* ubiquitin carboxyl-terminal hydrolase YUH1. The sample was further purified using  
394 HiTrap SP HP cation-exchange chromatography (Cytiva) and finally purified using HiLoad  
395 26/600 Superdex 75 size-exclusion chromatography equilibrated with 1 × ITC buffer (10 mM  
396 HEPES (pH7.5), 150 mM NaCl, 0.25 mM tris (2-carboxyethyl)phosphine (TCEP)). The H3  
397 peptide (residues 1–36 with an additional tryptophan residue at their C-terminus, hereafter H3<sub>1-</sub>  
398 <sub>37W</sub>), mouse DPPA3, full-length mouse UHRF1, full-length human UHRF1, mouse UBA1 and  
399 human UBE2D3 for the *in vitro* ubiquitination assay were purified according to previous  
400 reports<sup>17,29</sup>.

401 For the preparation of <sup>15</sup>N-labeled or <sup>13</sup>C,<sup>15</sup>N-double labeled hPHD, M9 minimal media  
402 containing 0.5 g/l <sup>15</sup>NH<sub>4</sub>Cl or 0.5 g/l <sup>15</sup>NH<sub>4</sub>Cl and 1 g/l <sup>13</sup>C-glucose was used instead of LB  
403 media. Site-directed mutagenesis of hPHD and hDPPA3<sub>81-118</sub> was performed by designing two  
404 primers containing the mutations. The mutants of hDPPA3<sub>81-118</sub> and the labeled hPHD were  
405 purified using the same protocol. The mutants of hDPPA3<sub>81-118</sub> and the labeled hPHD were

406 purified by the same protocol.

407

### 408 **Crystallography of hPHD in complex with hDPPA3 peptide**

409 The hPHD:hDPPA3<sub>81-118</sub> complex was prepared by adding an equi-molar excess of hDPPA3  
410 peptide to hPHD prior to crystallization. The crystal was obtained using an 8 mg/ml  
411 concentration of the complex at 4°C and the hanging drop vapor diffusion method with a  
412 reservoir solution containing 100 mM Tris-HCl (pH 8.5) and 2 M Ammonium sulfate. The  
413 crystal was directly frozen in liquid nitrogen using a cryoprotectant containing 25% (v/v)  
414 ethylene glycol. The X-ray diffraction data were collected at a wavelength of 0.98000 Å on a  
415 Pilatus3 6M detector in beam line BL-17A at Photon Factory (Tsukuba, Japan) and scaled at  
416 2.40 Å resolution using the program XDS package<sup>41</sup> and Aimless<sup>42</sup>. After molecular  
417 replacement by PHASER<sup>43</sup> using human PHD finger (PDB: 3ASL) as a search model and  
418 several cycles of model refinement by PHENIX<sup>44</sup>, the final model converged at 2.40 Å  
419 resolution with a crystallographic *R*-factor of 23.3% and a free *R*-factor of 26.6%.

420 The crystallographic data and refinement statistics are given in Table 1. Figures were generated  
421 using PyMol (<http://www.pymol.org>).

422

### 423 **NMR**

424 All NMR experiments were performed using a Bruker BioSpin Avance III HD spectrometers  
425 with TCI triple-resonance cryogenic probe-heads and basic <sup>1</sup>H resonance frequency of 600.03  
426 and 800.23 MHz. Three-dimensional (3D) spectra for backbone signal assignments, including  
427 HNCACB, CACB(CO)NH, HNCA, HN(CO)CA, HNCO, and HN(CA)CO, were acquired at  
428 293 K for 520 μM [<sup>13</sup>C, <sup>15</sup>N]-hPHD dissolved in PBS buffer (pH 7.0) containing 1 mM DTT  
429 and 5% D<sub>2</sub>O. For the complex state, 260 μM [<sup>13</sup>C, <sup>15</sup>N]-hPHD with hDPPA3<sub>811-118</sub> at molar  
430 ratio of 1:2 was used in the buffer same as the free state. The spectral widths (total number of  
431 data points) of each spectrum were 18 ppm (2048) for the <sup>1</sup>H dimension and 24 ppm (192) for

432 the  $^{15}\text{N}$  dimension. All 3D spectra were acquired using non-uniform sampling (NUS) to  
433 randomly reduce the  $t_1$  and  $t_2$  time-domain data points by 25%. The uniformly sampled data  
434 were reconstructed from the raw NMR data using various techniques such as IST or SMILE<sup>45,46</sup>.  
435 All NMR spectra were processed using NMRPipe<sup>47</sup>. For NMR analysis, an integrated package  
436 of NMR tools named MagRO-NMRViewJ, version 2.01.41<sup>48</sup>, on NMRView was used<sup>49</sup>.  
437 For the competition experiments,  $^1\text{H}$ - $^{15}\text{N}$  HSQC spectra were measured at 293K for 60  $\mu\text{M}$   
438 [ $^{15}\text{N}$ ]-hPHD in the presence of hDPPA<sub>81-118</sub> and/or the H3<sub>1-37W</sub> peptide at molar ratios  
439 (hPHD:hPDDA3:H3) of 1:0:0, 1:2:0, 1:0:2, 1:2:2 and 1:2:8.

440

#### 441 **ITC measurements**

442 Microcal PEAQ-ITC (Malvern) was used for ITC measurements. Wild-type and mutants of  
443 hPHD and hDPPA3 were dissolved in ITC buffer (10 mM HEPES [pH 7.5] buffer containing  
444 150 mM NaCl and 0.25 mM TCEP). All measurements were carried out at 293 K. The data  
445 were analyzed with Microcal PEAQ-ITC analysis software using a one-site model. For each  
446 interaction, at least three independent titration experiments were performed to show the  
447 dissociation constants with mean standard deviation.

448

#### 449 **CD**

450 Far-UV circular dichroism (CD) spectra were obtained using a JASCO J-1100 model  
451 spectrometer. All samples were prepared at a concentration of 20  $\mu\text{M}$ , dissolved in 10 mM  
452 HEPES [pH7.5] buffer containing 150 mM NaCl, 0.25 mM TCEP. The measurements were  
453 performed at 293 K with a path length of 1 mm.

454

#### 455 **SEC-SAXS**

456 SAXS data were collected on Photon Factory BL-10C using an HPLC Nexera/Prominence-I  
457 (Shimadzu) integrated SAXS set-up<sup>50</sup>. 50  $\mu\text{L}$  of 12 mg/mL hPHD and hPHD:hDPPA3<sub>81-118</sub>

458 complex and 20 mg/ml hDPPA<sub>381-118</sub> were loaded onto a Superdex® 200 Increase 5/150 GL  
459 (Cytiva) pre-equilibrated with 20 mM Tris-HCl (pH 7.5), 150 mM NaCl, 2 mM DTT, 10 μM  
460 zinc acetate and 5% glycerol at a flow rate of 0.25 mL/min at 20 °C. The flow rate was reduced  
461 to 0.025 mL/min at an elution volume of 1.9–2.8 mL. X-ray scattering data were collected  
462 every 20 s on a PILATUS3 2 M detector over an angular range of  $q_{\min} = 0.00690 \text{ \AA}^{-1}$  to  
463  $q_{\max} = 0.27815 \text{ \AA}^{-1}$ . The UV spectra at the range of 200 to 450 nm were recorded every 10 s.  
464 Circular averaging and buffer subtraction were carried out using the program SAngler<sup>51</sup> to  
465 obtain one-dimensional scattering data  $I(q)$  as a function of  $q$  ( $q = 4\pi\sin\theta/\lambda$ , where  $2\theta$  is the  
466 scattering angle and  $\lambda$  is the X-ray wavelength 1.5 Å). The scattering intensity was normalized  
467 on an absolute scale using the scattering intensity of water<sup>42</sup>. The multiple concentrations of  
468 the scattering data around the peak at A280, namely the ascending and descending parts of the  
469 chromatography peak, and  $I(0)$  were extrapolated to zero-concentration using MOLASS<sup>52</sup>. The  
470 molecular mass of the measured proteins was estimated using the empirical volume of  
471 correlation,  $V_c$ , showing no aggregation of the measured sample<sup>35</sup>. The radius of gyration  $R_g$   
472 and forward scattering intensity  $I(0)$  were estimated from the Guinier plot of  $I(q)$  in the smaller-  
473 angle region of  $qR_g < 1.3$ . The distance distribution function,  $P(r)$ , was calculated using the  
474 program GNOM<sup>53</sup>. The maximum particle dimension  $D_{\max}$  was estimated from the  $P(r)$   
475 function as the distance  $r$  for which  $P(r) = 0$ . The scattering profile of the crystal structure of  
476 hPHD:hDPPA<sub>381-118</sub> was computed using CRY SOL<sup>54</sup> software. Ab initio model of  
477 hPHD:hDPPA<sub>381-118</sub> was created using GASBOR and DAMAVER<sup>55,56</sup>

478

#### 479 ***In vitro* ubiquitination assay**

480 Protein expression in *E. coli* and purification of mouse UBA1 (E1), human UBE2D3 (E2),  
481 human UHRF1 (E3), C-terminal FLAG tagged-H3<sub>1-37W</sub> and ubiquitin were performed  
482 according to previous reports<sup>17</sup>. The ubiquitination reaction mixtures contained 100 μM  
483 ubiquitin, 200 nM E1, 8 μM E2, 3 μM E3, 5 mM ATP, and 20 μM C-terminal FLAG tagged-



484 H3<sub>1-37W</sub> in the presence and absence of hDPPA3<sub>81-118</sub> in ubiquitination reaction buffer (50 mM  
485 Tris-HCl [pH 8.0], 50 mM NaCl, 5 mM MgCl<sub>2</sub>, 0.1% Triton X-100, 2 mM DTT). The mixture  
486 was incubated at 30°C for 3 h and the reaction was stopped by adding 3×SDS loading buffer.  
487 The reaction was analyzed by SDS-PAGE, followed by Western blotting using a 1/5,000 diluted  
488 anti-FLAG antibody (Cell Signaling Technology, #2368).

489

#### 490 ***Xenopus* interphase egg extracts and purification of chromatin**

491 *Xenopus laevis* was purchased from Kato-S Kagaku and handled according to animal care  
492 regulations at the University of Tokyo. Interphase egg extracts were prepared as described  
493 previously<sup>12</sup>. Unfertilized *Xenopus* eggs were dejellied in 2.5% thioglycolic acid-NaOH (pH  
494 8.2) and washed three times in 0.2×MMR buffer (5 mM HEPES-KOH [pH 7.6], 100 mM NaCl,  
495 2 mM KCl, 0.1 mM EDTA, 1 mM MgCl<sub>2</sub>, 2 mM CaCl<sub>2</sub>). After activation in 1×MMR  
496 supplemented with 0.3 µg/mL calcium ionophore, eggs were washed four times with EB buffer  
497 (10 mM HEPES-KOH [pH 7.7], 100 mM KCl, 0.1 mM CaCl<sub>2</sub>, 1 mM MgCl<sub>2</sub>, 50 mM sucrose).  
498 Packed eggs were crushed by centrifugation (BECKMAN, Avanti J-E, JS13.1 swinging rotor)  
499 for 20 min at 18,973×g. Egg extracts were supplemented with 50 µg/mL cycloheximide, 20  
500 µg/mL cytochalasin B, 1 mM DTT, 2 µg/mL aprotinin, and 50 µg/mL leupeptin and clarified  
501 for 20 min at 48,400×g (Hitachi, CP100NX, P55ST2 swinging rotor). The cytoplasmic extracts  
502 were aliquoted and stored at -80°C. Chromatin purification after incubation in egg extracts was  
503 performed as previously described with modifications. Sperm nuclei were incubated in egg  
504 extracts supplemented with an ATP regeneration system (20 mM phosphocreatine, 4 mM ATP,  
505 and 5 µg/mL creatine phosphokinase) at 3000–4000 nuclei/µL at 22°C. Aliquots (15 µL) were  
506 diluted with 150–200 µL of chromatin purification buffer (CPB; 50 mM KCl, 5 mM MgCl<sub>2</sub>, 20  
507 mM HEPES-KOH [pH 7.7]) containing 0.1% NP-40, 2% sucrose, and 2 mM NEM. After  
508 incubation on ice for 5 min, the extracts were layered over 1.5 mL CPB containing 30% sucrose  
509 and centrifuged at 15,000×g for 10 min at 4°C. Chromatin pellets were resuspended in

510 1×Laemmli sample buffer, heated for 5 min and analyzed by SDS-PAGE. Recombinant FLAG-  
511 tagged mDPPA3 and hDPPA3 were added to egg extracts at 0.5-1.0 μM. For FLAG-tagged  
512 protein expression in insect cells, 3×FLAG-tagged *mDppa3* or *hDppa3* were sub-cloned into  
513 pVL1392 vector. Baculoviruses were produced using a BD BaculoGold Transfection Kit and a  
514 BestBac Transfection Kit (BD Biosciences) following the manufacturer’s protocol. Proteins  
515 were expressed in Sf9 insect cells by infection with viruses expressing 3×FLAG-tagged  
516 mDPPA3 WT or its mutants for 72 h at 27 °C. Sf9 cells from a 750 ml culture were collected  
517 and lysed by resuspending them in 30 ml lysis buffer, followed by incubation on ice for 10 min.  
518 The soluble fraction was obtained after centrifugation of the lysate at 15,000×g for 15 min at  
519 4 °C. The soluble fraction was incubated with 250 μL anti-FLAG M2 affinity resin equilibrated  
520 with lysis buffer for 4 h at 4 °C. The beads were collected and washed with 10 ml wash buffer  
521 and then with 5 ml of EB [20 mM HEPES-KOH (pH 7.5), 100 mM KCl, 5 mM MgCl<sub>2</sub>]  
522 containing 1 mM DTT. Each recombinant protein was eluted twice in 250 μL EB containing 1  
523 mM DTT and 250 μg/ml 3×FLAG peptide (Sigma-Aldrich). The eluates were pooled and  
524 concentrated using a Vivaspin 500 (GE Healthcare).

525 **Data Availability**

526 Coordinate of atomic model of human UHRF1 PHD finger in complex with human DPPA3  
527 was deposited in the Protein Data Bank with accession code 8WMS. All data needed to evaluate  
528 the conclusions in the paper are presented in the paper and/or Supplementary Materials.  
529 Additional data related to this paper may be requested from the authors.  
530

531 **References**

- 532 1. Schübeler, D. Function and information content of DNA methylation. *Nature* **517**, 321–  
533 326 (2015).
- 534 2. Greenberg, M. V. C. & Bourc’his, D. The diverse roles of DNA methylation in  
535 mammalian development and disease. *Nat Rev Mol Cell Biol* **20**, 590–607 (2019).
- 536 3. Petryk, N., Bultmann, S., Bartke, T. & Defossez, P. A. Staying true to yourself:  
537 mechanisms of DNA methylation maintenance in mammals. *Nucleic Acids Res* **49**,  
538 3020–3032 (2021).
- 539 4. Nishiyama, A. & Nakanishi, M. Navigating the DNA methylation landscape of cancer.  
540 *Trends in Genetics* **37**, 1012–1027 (2021).
- 541 5. Sharif, J. *et al.* The SRA protein Np95 mediates epigenetic inheritance by recruiting  
542 Dnmt1 to methylated DNA. *Nature* **450**, 908–912 (2007).
- 543 6. Bostick, M. *et al.* UHRF1 plays a role in maintaining DNA methylation in mammalian  
544 cells. *Science* **317**, 1760–1764 (2007).
- 545 7. von Meyenn, F. *et al.* Impairment of DNA Methylation Maintenance Is the Main Cause  
546 of Global Demethylation in Naive Embryonic Stem Cells. *Mol Cell* **62**, 848–861 (2016).
- 547 8. Smets, M. *et al.* DNMT1 mutations found in HSNIE patients affect interaction with  
548 UHRF1 and neuronal differentiation. *Hum Mol Genet* **26**, 1522–1534 (2017).
- 549 9. Avvakumov, G. V *et al.* Structural basis for recognition of hemi-methylated DNA by the  
550 SRA domain of human UHRF1. *Nature* **455**, 822–825 (2008).
- 551 10. Hashimoto, H. *et al.* The SRA domain of UHRF1 flips 5-methylcytosine out of the DNA  
552 helix. *Nature* **455**, 826–829 (2008).
- 553 11. Arita, K., Ariyoshi, M., Tochio, H., Nakamura, Y. & Shirakawa, M. Recognition of  
554 hemi-methylated DNA by the SRA protein UHRF1 by a base-flipping mechanism.  
555 *Nature* **455**, 818–821 (2008).
- 556 12. Nishiyama, A. *et al.* Uhrf1-dependent H3K23 ubiquitylation couples maintenance DNA  
557 methylation and replication. *Nature* **502**, 249–53 (2013).
- 558 13. Qin, W. *et al.* DNA methylation requires a DNMT1 ubiquitin interacting motif (UIM)  
559 and histone ubiquitination. *Cell Res* **25**, 911–29 (2015).
- 560 14. Ishiyama, S. *et al.* Structure of the Dnmt1 Reader Module Complexed with a Unique  
561 Two-Mono-Ubiquitin Mark on Histone H3 Reveals the Basis for DNA Methylation  
562 Maintenance. *Mol Cell* **68**, 350-360.e7 (2017).
- 563 15. Foster, B. M. *et al.* Critical Role of the UBL Domain in Stimulating the E3 Ubiquitin  
564 Ligase Activity of UHRF1 toward Chromatin. *Mol Cell* **72**, 739-752.e9 (2018).
- 565 16. DaRosa, P. A. *et al.* A Bifunctional Role for the UHRF1 UBL Domain in the Control of  
566 Hemi-methylated DNA-Dependent Histone Ubiquitylation. *Mol Cell* **72**, 753-765.e6  
567 (2018).
- 568 17. Nishiyama, A. *et al.* Two distinct modes of DNMT1 recruitment ensure stable

- 569 maintenance DNA methylation. *Nat Commun* **11**, 1222 (2020).
- 570 18. X, M. *et al.* Kinetics and mechanisms of mitotic inheritance of DNA methylation and  
571 their roles in aging-associated methylome deterioration. *Cell Res* **30**, 980–996 (2020).
- 572 19. Miyashita, R. *et al.* The termination of UHRF1-dependent PAF15 ubiquitin signaling is  
573 regulated by USP7 and ATAD5. *Elife* **12**, (2023).
- 574 20. Kikuchi, A. *et al.* Structural basis for activation of DNMT1. *Nat Commun* **13**, (2022).
- 575 21. Yan, R. *et al.* Dynamics of DNA hydroxymethylation and methylation during mouse  
576 embryonic and germline development. *Nat Genet* **55**, 130–143 (2023).
- 577 22. Uemura, S. *et al.* UHRF1 is essential for proper cytoplasmic architecture and function  
578 of mouse oocytes and derived embryos. *Life Sci Alliance* **6**, (2023).
- 579 23. Maenohara, S. *et al.* Role of UHRF1 in de novo DNA methylation in oocytes and  
580 maintenance methylation in preimplantation embryos. *PLoS Genet* **13**, (2017).
- 581 24. Li, Y. *et al.* Stella safeguards the oocyte methylome by preventing de novo methylation  
582 mediated by DNMT1. *Nature* **564**, 136–140 (2018).
- 583 25. Funaki, S. *et al.* Inhibition of maintenance DNA methylation by Stella. *Biochem Biophys*  
584 *Res Commun* **453**, 455–460 (2014).
- 585 26. Du, W. *et al.* Stella protein facilitates DNA demethylation by disrupting the chromatin  
586 association of the RING finger-type E3 ubiquitin ligase UHRF1. *Journal of Biological*  
587 *Chemistry* **294**, 8907–8917 (2019).
- 588 27. Sato, M. *et al.* Identification of PGC7, a new gene expressed specifically in  
589 preimplantation embryos and germ cells. *Mech Dev* **113**, 91–94 (2002).
- 590 28. Saitou, M., Barton, S. C. & Surani, M. A. A molecular programme for the specification  
591 of germ cell fate in mice. *Nature* **418**, 293–300 (2002).
- 592 29. Hata, K. *et al.* Structural basis for the unique multifaceted interaction of DPPA3 with  
593 the UHRF1 PHD finger. *Nucleic Acids Res* **50**, 12527–12542 (2022).
- 594 30. Jentoft, I. M. A. *et al.* Mammalian oocytes store proteins for the early embryo on  
595 cytoplasmic lattices. *Cell* (2023) doi:10.1016/J.CELL.2023.10.003.
- 596 31. Arita, K. *et al.* Recognition of modification status on a histone H3 tail by linked histone  
597 reader modules of the epigenetic regulator UHRF1. *Proceedings of the National*  
598 *Academy of Sciences* **109**, 12950–12955 (2012).
- 599 32. Lee, B. & Richards, F. M. The interpretation of protein structures: estimation of static  
600 accessibility. *J Mol Biol* **55**, (1971).
- 601 33. Jurrus, E. *et al.* Improvements to the APBS biomolecular solvation software suite.  
602 *Protein Science* **27**, 112–128 (2018).
- 603 34. Sun, Y., Li, X., Chen, R., Liu, F. & Wei, S. Recent advances in structural characterization  
604 of biomacromolecules in foods via small-angle X-ray scattering. *Front Nutr* **9**, (2022).
- 605 35. Rambo, R. P. & Tainer, J. A. Accurate assessment of mass, models and resolution by  
606 small-angle scattering. *Nature* **496**, 477–481 (2013).

- 607 36. Brocca, S., Grandori, R., Longhi, S. & Uversky, V. Liquid–Liquid Phase Separation by  
608 Intrinsically Disordered Protein Regions of Viruses: Roles in Viral Life Cycle and  
609 Control of Virus–Host Interactions. *International Journal of Molecular Sciences* 2020,  
610 *Vol. 21, Page 9045* **21**, 9045 (2020).
- 611 37. Hardenberg, M., Horvath, A., Ambrus, V., Fuxreiter, M. & Vendruscolo, M. Widespread  
612 occurrence of the droplet state of proteins in the human proteome. *Proc Natl Acad Sci U*  
613 *S A* **117**, 33254–33262 (2020).
- 614 38. Meng, T. G. *et al.* NLRP14 Safeguards Calcium Homeostasis via Regulating the K27  
615 Ubiquitination of Nclx in Oocyte-to-Embryo Transition. *Adv Sci (Weinh)* (2023)  
616 doi:10.1002/ADVS.202301940.
- 617 39. Gasparski, A. N. *et al.* mRNA location and translation rate determine protein targeting  
618 to dual destinations. *Mol Cell* **83**, 2726–2738.e9 (2023).
- 619 40. Jumper, J. *et al.* Highly accurate protein structure prediction with AlphaFold. *Nature*  
620 *2021 596:7873* **596**, 583–589 (2021).
- 621 41. Kabsch, W. XDS. *Acta Crystallogr D Biol Crystallogr* **66**, 125–32 (2010).
- 622 42. Evans, P. R. & Murshudov, G. N. How good are my data and what is the resolution?  
623 *Acta Crystallogr D Biol Crystallogr* **69**, 1204–1214 (2013).
- 624 43. McCoy, A. J. *et al.* Phaser crystallographic software. *J Appl Crystallogr* **40**, 658–674  
625 (2007).
- 626 44. Afonine, P. V *et al.* Towards automated crystallographic structure refinement with  
627 phenix.refine. *Acta Crystallogr D Biol Crystallogr* **68**, 352–67 (2012).
- 628 45. Ying, J., Delaglio, F., Torchia, D. A. & Bax, A. Sparse multidimensional iterative  
629 lineshape-enhanced (SMILE) reconstruction of both non-uniformly sampled and  
630 conventional NMR data. *J Biomol NMR* **68**, 101–118 (2017).
- 631 46. Hyberts, S. G., Milbradt, A. G., Wagner, A. B., Arthanari, H. & Wagner, G. Application  
632 of iterative soft thresholding for fast reconstruction of NMR data non-uniformly  
633 sampled with multidimensional Poisson Gap scheduling. *J Biomol NMR* **52**, 315–327  
634 (2012).
- 635 47. Delaglio, F. *et al.* NMRPipe: A multidimensional spectral processing system based on  
636 UNIX pipes. *Journal of Biomolecular NMR* 1995 6:3 **6**, 277–293 (1995).
- 637 48. Kobayashi, N. *et al.* KUIJIRA, a package of integrated modules for systematic and  
638 interactive analysis of NMR data directed to high-throughput NMR structure studies. *J*  
639 *Biomol NMR* **39**, 31–52 (2007).
- 640 49. Johnson, B. A. & Blevins, R. A. NMR View: A computer program for the visualization  
641 and analysis of NMR data. *Journal of Biomolecular NMR* 1994 4:5 **4**, 603–614 (1994).
- 642 50. Shimizu, N. *et al.* BL-10C, the small-angle x-ray scattering beamline at the photon  
643 factory. in 060041 (2019). doi:10.1063/1.5084672.
- 644 51. Shimizu, N. *et al.* Software development for analysis of small-angle x-ray scattering

- 645 data. in *AIP Conference Proceedings* vol. 1741 050017 (AIP Publishing LLC, 2016).
- 646 52. Yonezawa, K., Takahashi, M., Yatabe, K., Nagatani, Y. & Shimizu, N. MOLASS:  
647 Software for automatic processing of matrix data obtained from small-angle X-ray  
648 scattering and UV–visible spectroscopy combined with size-exclusion chromatography.  
649 *Biophys Physicobiol* **20**, e200001 (2023).
- 650 53. Svergun, D. I. & IUCr. Determination of the regularization parameter in indirect-  
651 transform methods using perceptual criteria. *J Appl Crystallogr* **25**, 495–503 (1992).
- 652 54. Svergun, D., Barberato, C. & Koch, M. H. CRY SOL – a Program to Evaluate X-ray  
653 Solution Scattering of Biological Macromolecules from Atomic Coordinates.  
654 *urn:issn:0021-8898* **28**, 768–773 (1995).
- 655 55. Volkov, V. V. & Svergun, D. I. Uniqueness of ab initio shape determination in small-  
656 angle scattering. *J Appl Crystallogr* **36**, 860–864 (2003).
- 657 56. Svergun, D. I., Petoukhov, M. V. & Koch, M. H. J. Determination of domain structure  
658 of proteins from X-ray solution scattering. *Biophys J* **80**, 2946 (2001).
- 659
- 660

661 **Author Contributions**

662 K.A. conceived the study and experimental design, analyzed the experiments, and wrote the  
663 manuscript. N.S. and K.A. performed the protein purification, X-ray crystallography, SAXS  
664 measurements, and ITC experiments. N.S. performed CD experiments. N.S. and N.N.  
665 performed *in vitro* ubiquitination assays. S.H. and T. K. performed NMR experiments and  
666 analyzed the data. Y.C. IM. H. M. N. and A.N. performed the biochemical assays using *Xenopus*  
667 egg extracts.

668

669 **FUNDING**

670 This study was supported by MEXT/JSPS KAKENHI (JP18H02392, JP19H05294,  
671 JP19H05741, and 24K01967 to K.A., 19H05285 and 21H00272 to A.N., and 23K05720 to  
672 T.K.), PRESTO (14530337) from JST to K.A., a grant for 2021–2023 Strategic Research  
673 Promotion (No. SK201904) of Yokohama City University to K.A., and Research Development  
674 Fund of Yokohama City University to T.K.

675

676 **CONFLICT OF INTEREST**

677 The authors declare no competing interests.

678



679 Table 1. Data collection and refinement statistics

| hPHD:hDPPA3 680<br>(PDB:8WMS)                           |                          |
|---------------------------------------------------------|--------------------------|
| <b>Data collection</b>                                  |                          |
| Space group                                             | <i>I4<sub>1</sub>22</i>  |
| Cell dimensions                                         |                          |
| <i>a, b, c</i> (Å)                                      | 77.80 77.80 140.67       |
| Resolution (Å)                                          | 43.33-2.40 (2.49-2.40) * |
| <i>R</i> <sub>meas</sub> (%)                            | 7.0 (53.7) *             |
| <i>R</i> <sub>pim</sub> (%)                             | 2.6 (21.0) *             |
| Mean ( <i>I</i> /σ( <i>I</i> ))                         | 12.5 (2.5) *             |
| <i>CC</i> <sub>1/2</sub>                                | 99.9 (89.6) *            |
| Completeness (%)                                        | 99.7 (99.6) *            |
| Redundancy                                              | 5.4 (5.7) *              |
| Total reflections                                       | 47,813 (5,172) *         |
| Unique reflections                                      | 8,775 (903) *            |
| <b>Refinement</b>                                       |                          |
| Resolution (Å)                                          | 43.33-2.40               |
| No. reflections                                         | 8,693                    |
| <i>R</i> <sub>work</sub> / <i>R</i> <sub>free</sub> (%) | 23.3 / 26.6              |
| No. atoms                                               |                          |
| hPHD                                                    | 514                      |
| hDPPA3                                                  | 190                      |
| zinc                                                    | 4                        |
| <i>B</i> factors (Å <sup>2</sup> )                      |                          |
| hPHD                                                    | 79.9                     |
| hDPPA3                                                  | 83.5                     |
| zinc                                                    | 67.6                     |
| R.m.s. deviations                                       |                          |
| Bond lengths (Å)                                        | 0.004                    |
| Bond angles (°)                                         | 0.803                    |

681 \* ( ) Values in parentheses are for the highest-resolution shell.
